# Supplementary material
Source: Research Square preprint supplement (doi:10.21203/rs.3.rs-8991908/v1)
Supplement: Supplementary file 1 [file 2d12f25fd6c058b10fef0b0a.pdf]

# Supplementary Materials for

## **Utilizing noncoincident needs to site data centers with solar+storage at existing gas plants**

Emilia Chojkiewicz<sup>1,2\*</sup>, Aneesha Manocha<sup>1,2,3</sup>, Umed Paliwal<sup>2</sup>, Duncan Callaway<sup>1,3</sup>, Amol Phadke<sup>2</sup>

### **Affiliations:**

<sup>1</sup>Energy and Resources Group, University of California, Berkeley

<sup>2</sup>Goldman School of Public Policy, University of California, Berkeley

<sup>3</sup>Electrical Engineering & Computer Science, University of California, Berkeley

\*Corresponding author. Email: [emiliac@berkeley.edu](mailto:emiliac@berkeley.edu)

### **The PDF file includes:**

Figs. S1 to S7

Tables S1 to S3

References (1-6)

## Supplementary Figures

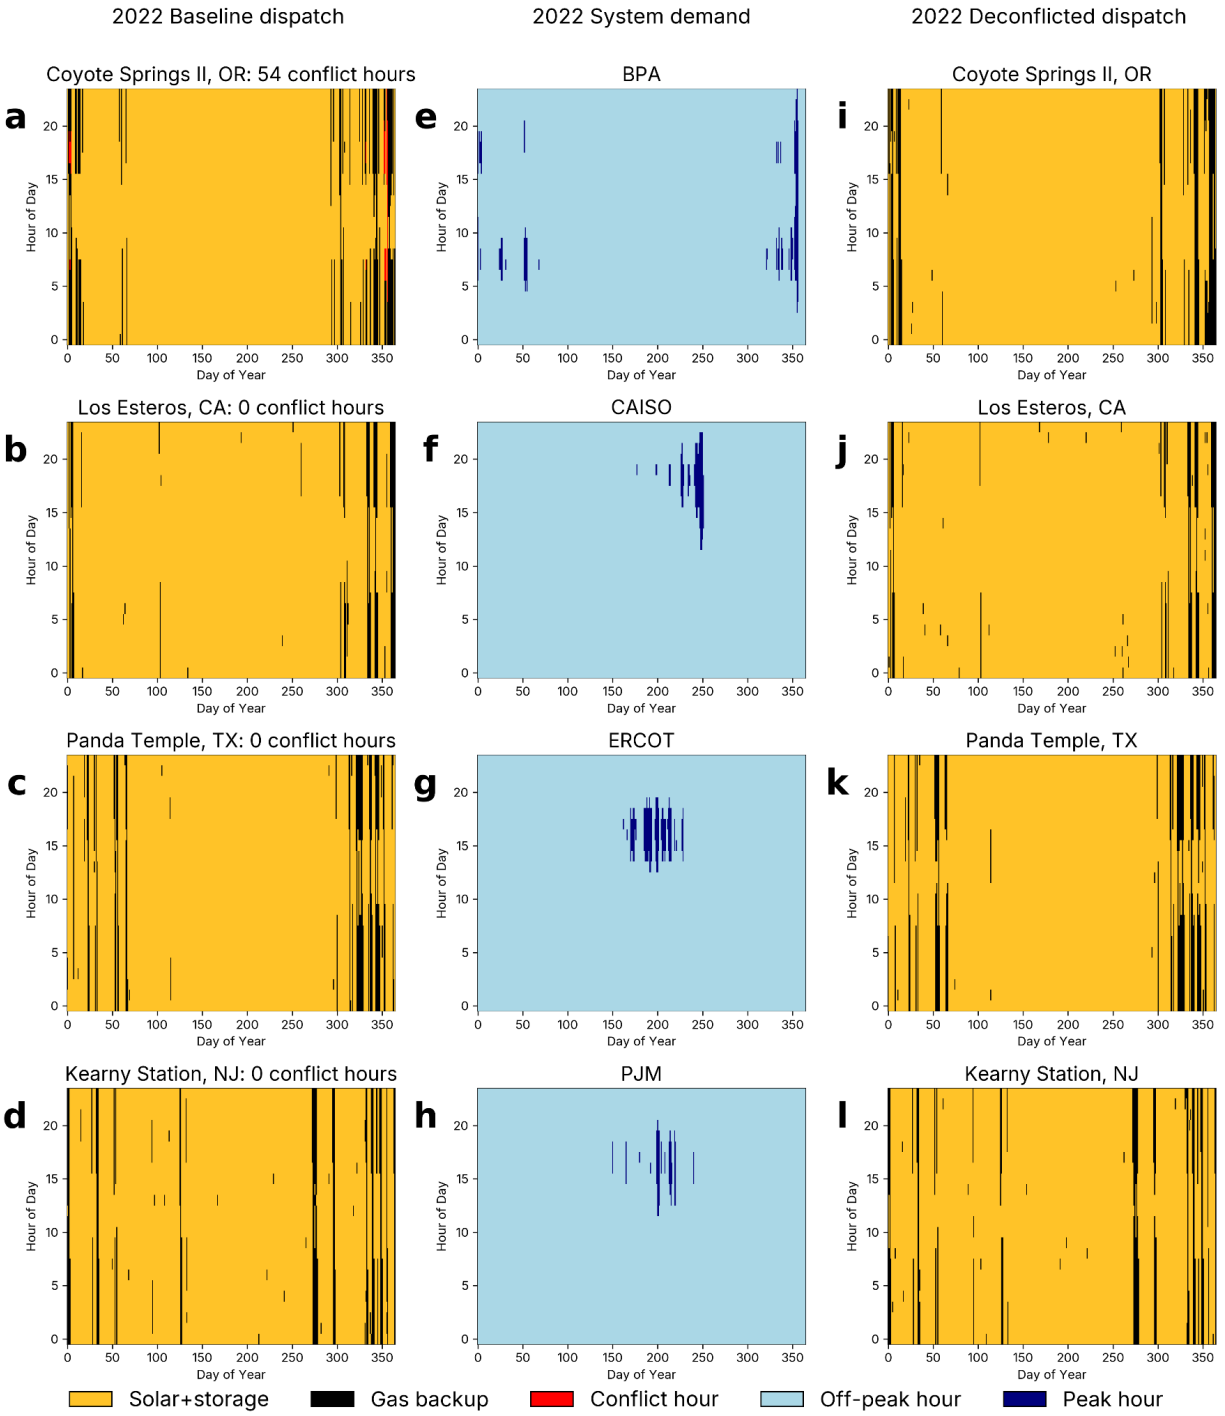

**Figure S1.** Heatmaps for BPA, CAISO, ERCOT, and PJM for 2022 with the top 1% of peak demand hours restricted for the local load.

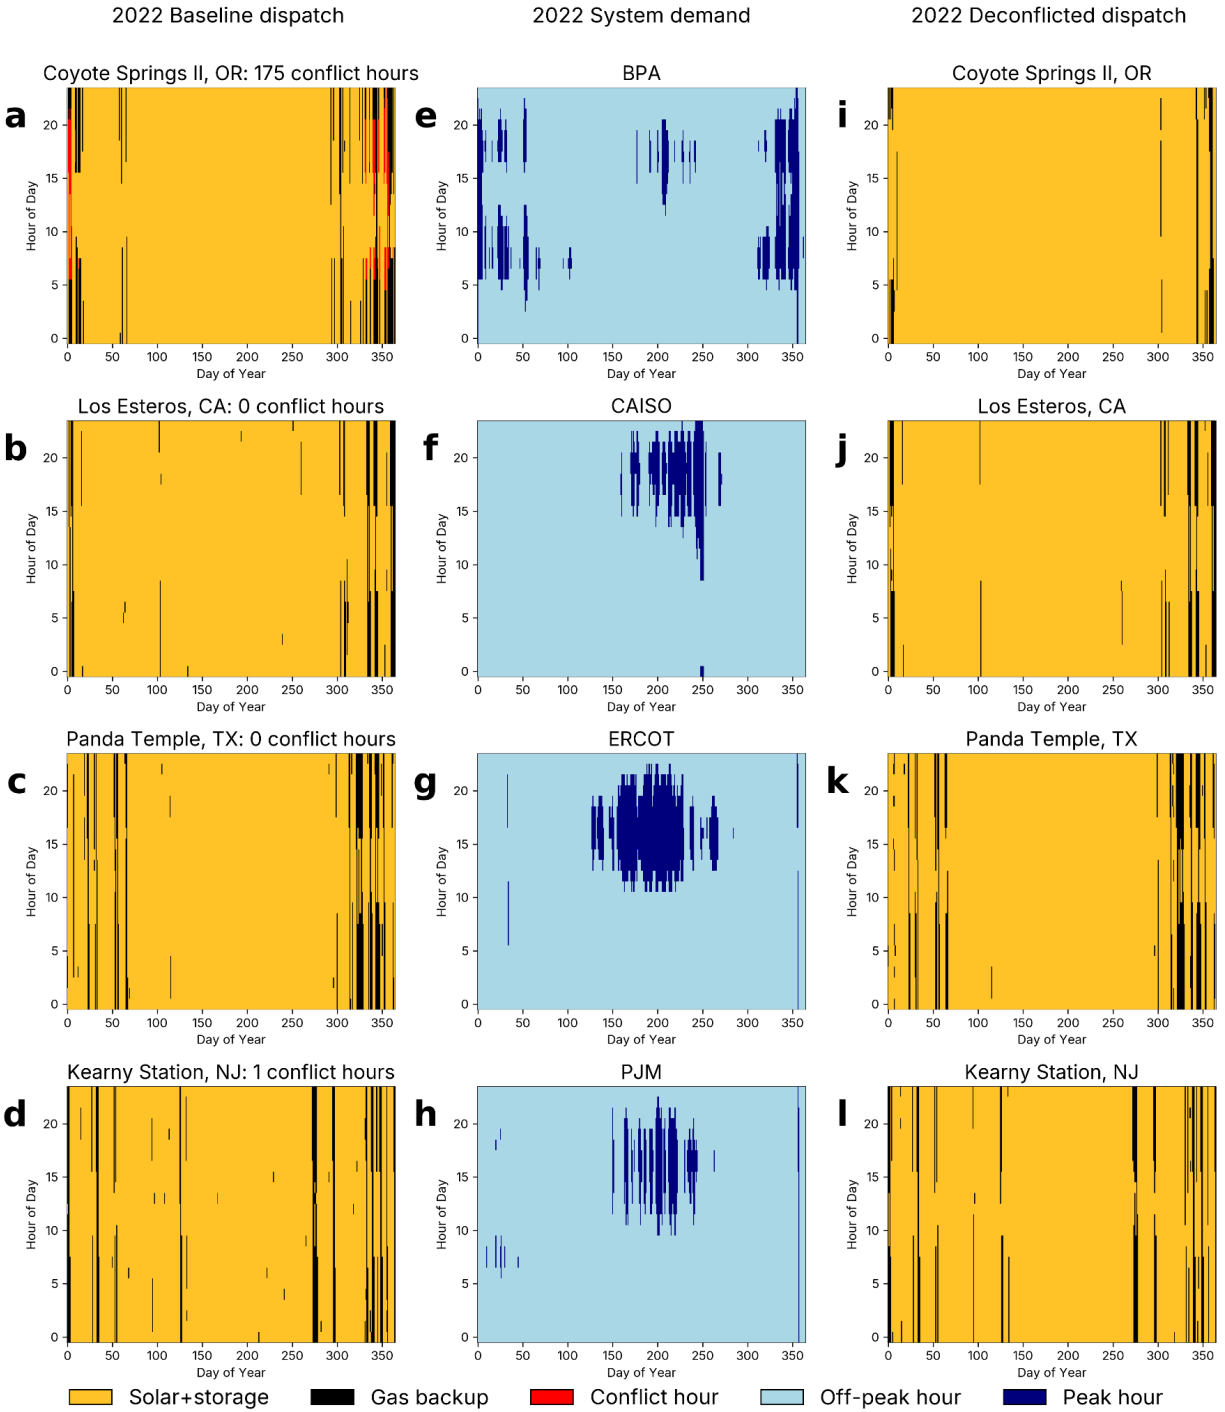

**Figure S2.** Heatmaps for BPA, CAISO, ERCOT, and PJM for 2022 with the top 5% of peak demand hours restricted for the local load.

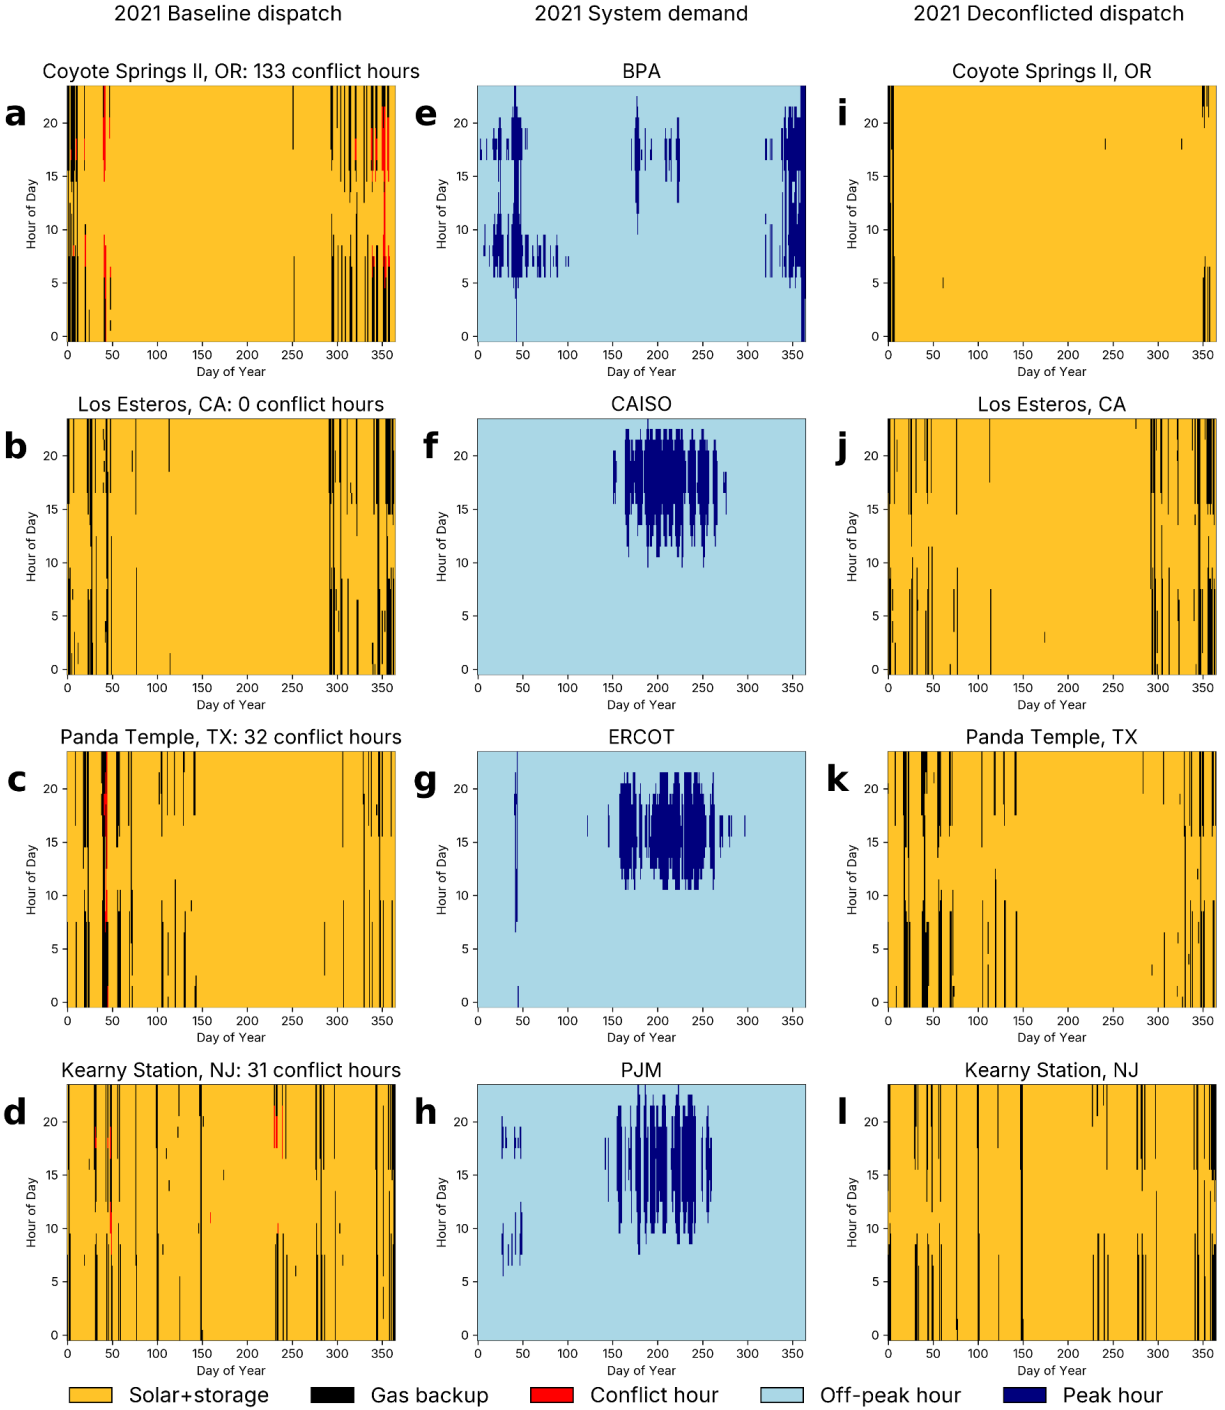

**Figure S3.** Heatmaps for BPA, CAISO, ERCOT, and PJM for 2021 with the top 10% of peak demand hours restricted for the local load.

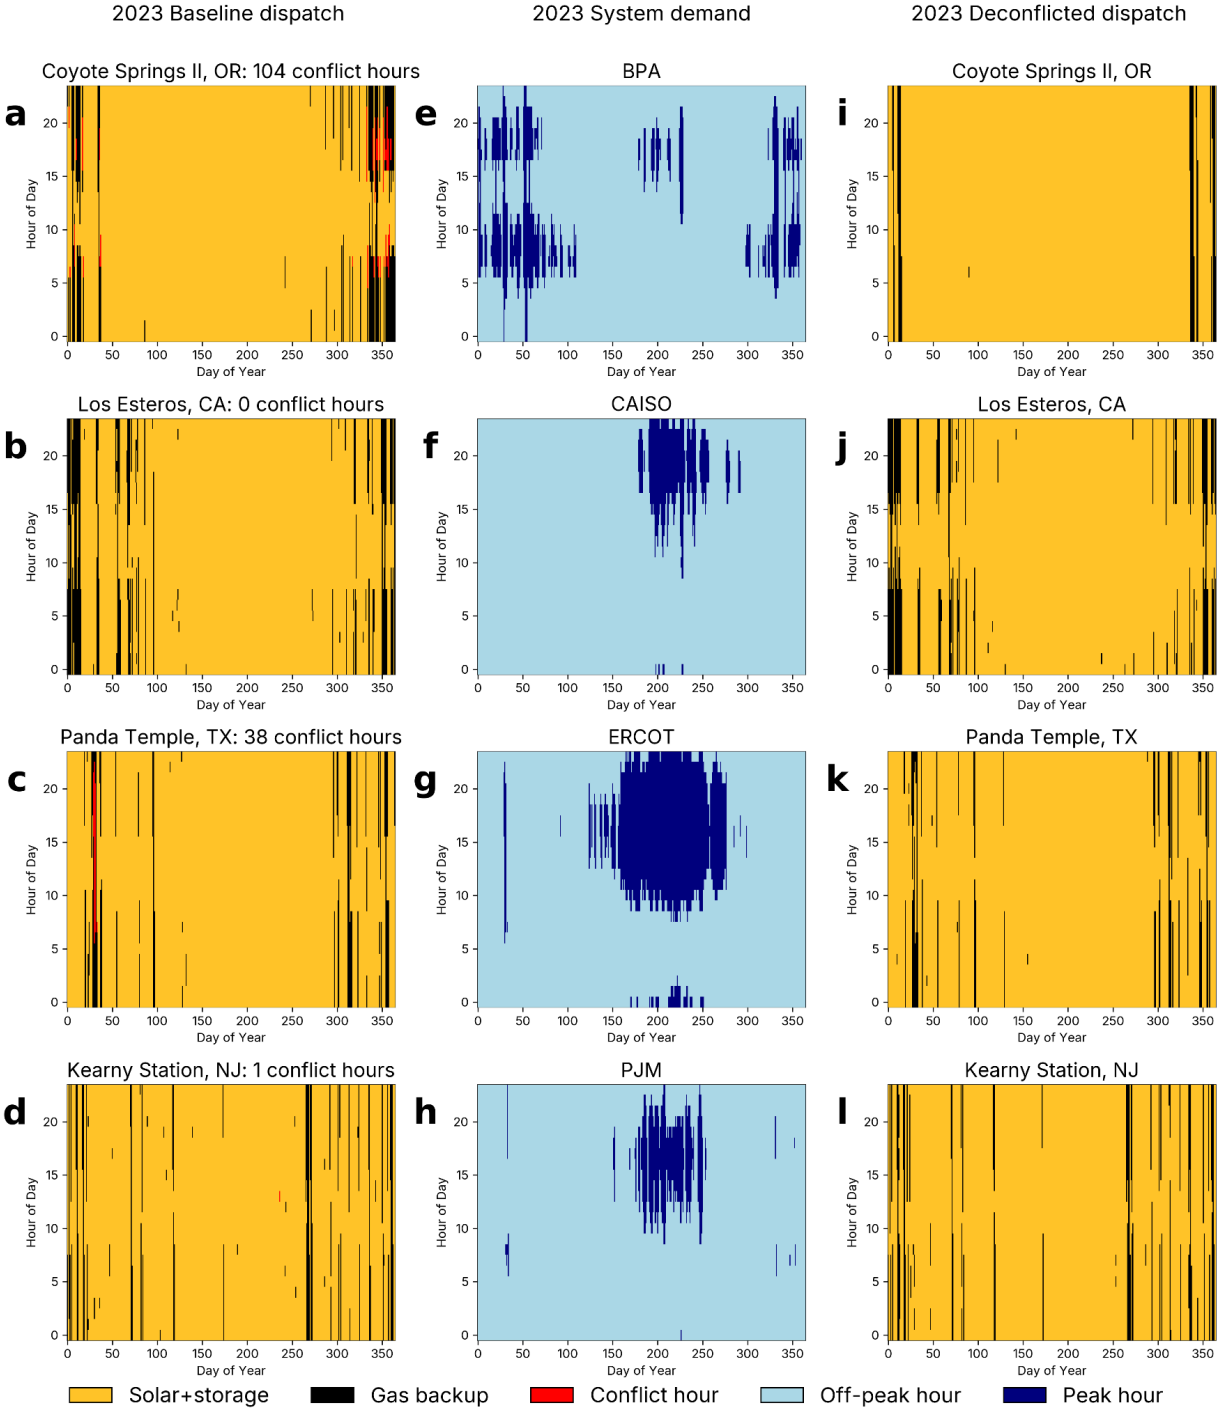

**Figure S4.** Heatmaps for BPA, CAISO, ERCOT, and PJM for 2023 with the top 10% of peak demand hours restricted for the local load.

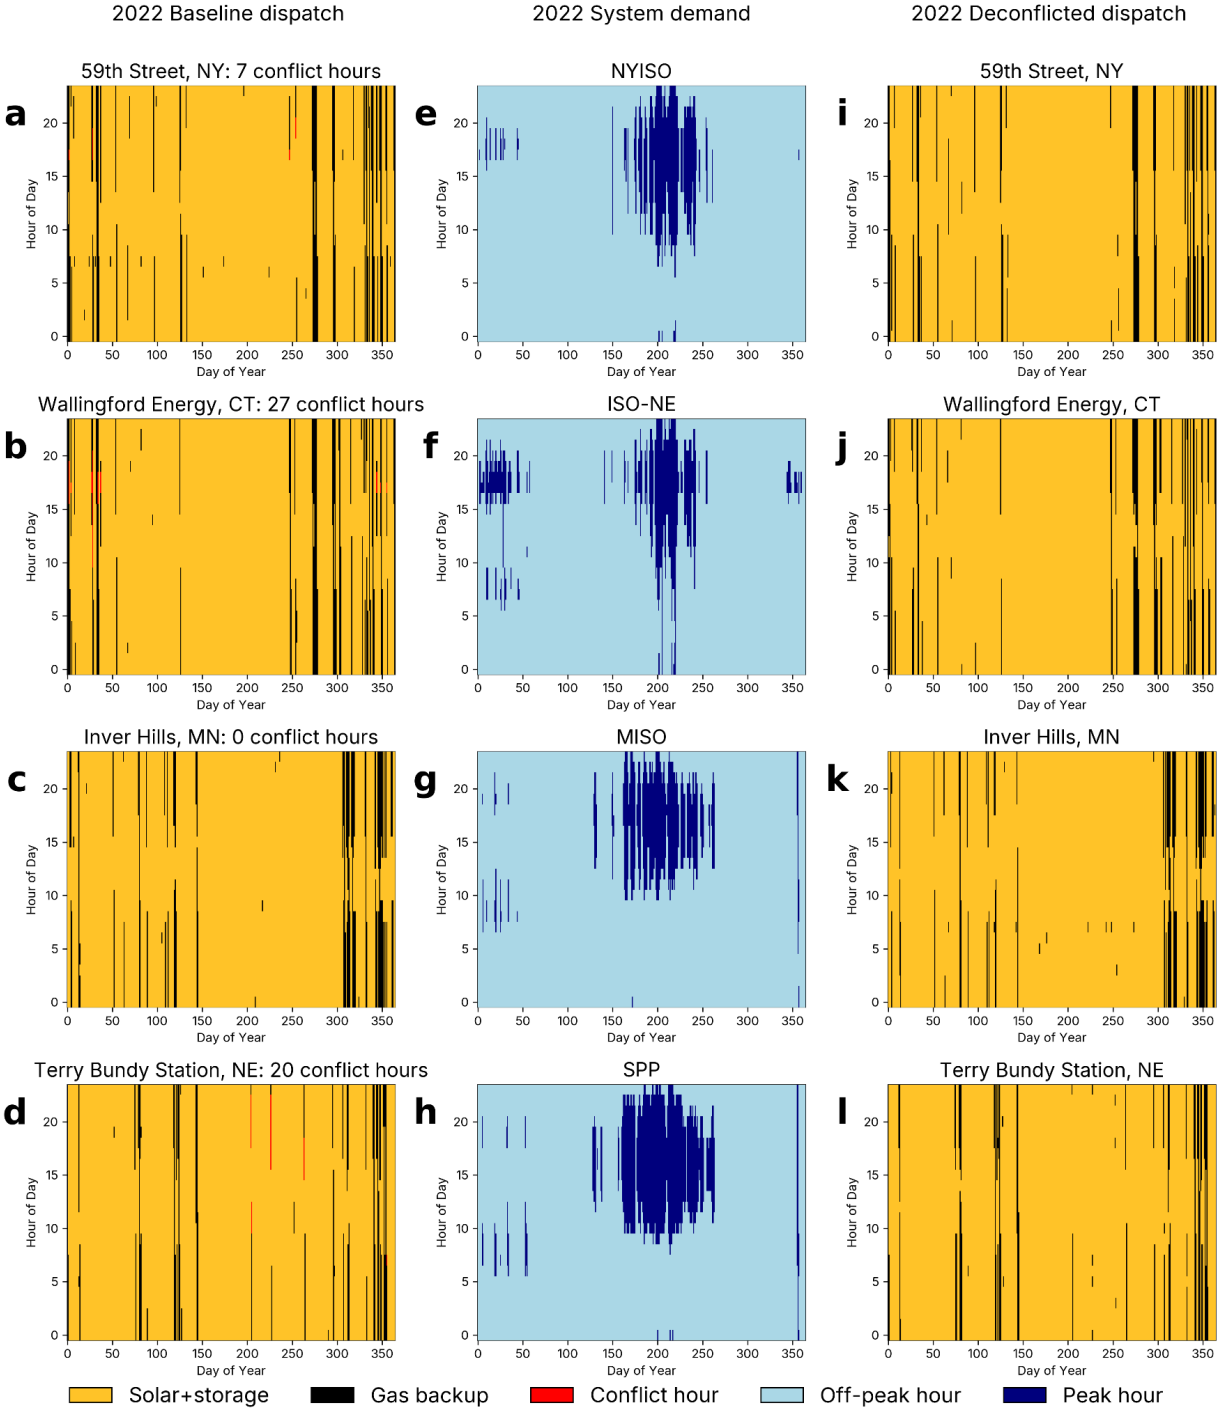

**Figure S5.** Heatmaps for NYISO, ISO-NE, MISO, and SPP for 2022 with the top 10% of peak demand hours restricted for the local load.

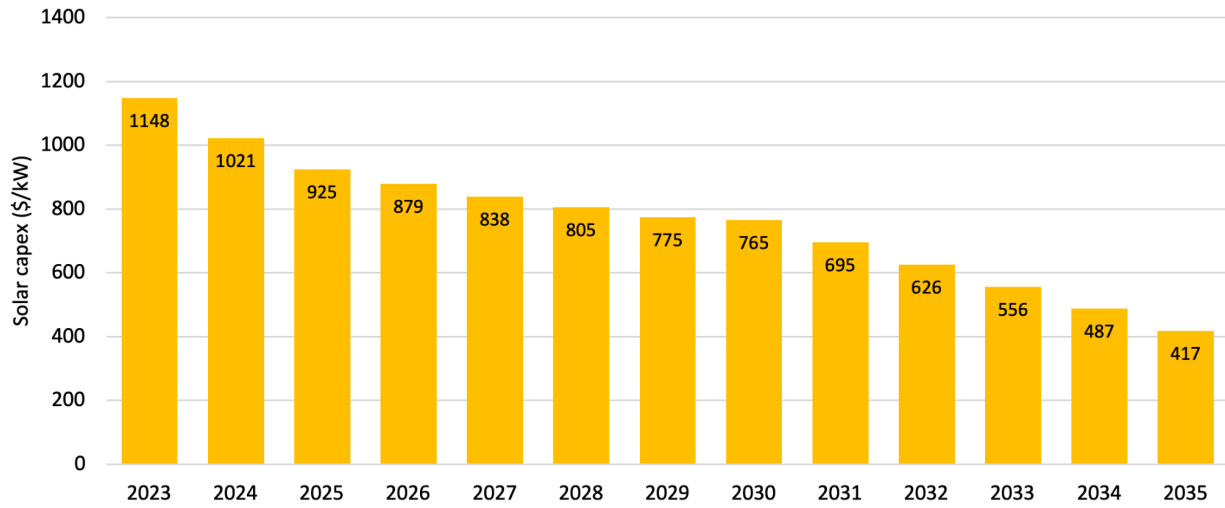

**Figure S6.** Progression of solar capital costs [1].

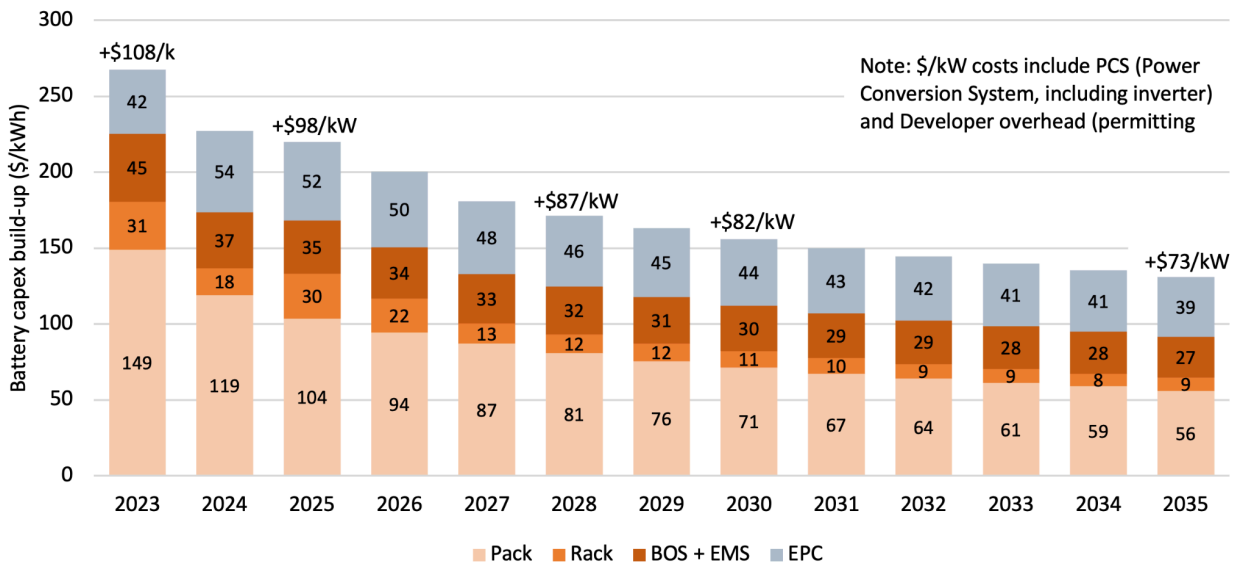

**Figure S7.** Progression and build-up of battery storage capital costs [1].

**Table S1. Gas operational constraints [2-5].**

| <b>Year</b>      | <b>Gas CT</b>       | <b>Gas CCGT</b>    |
|------------------|---------------------|--------------------|
| Ramp rate        | 100% of capacity/hr | 60% of capacity/hr |
| Minimum run rate | 20% of capacity     | 40% of capacity    |
| Startup cost     | \$10/MW             | \$40/MW            |
| Shutdown cost    | \$5/MW              | \$10/MW            |

**Table S2. Demand region to LBNL Balancing Area [6] mapping and solar energy values used for calculation of the curtailment revenue.**

| <b>Demand Region</b>                       | <b>LBNL Balancing Area</b> | <b>2023 Solar Energy Value<br/>(2025 US\$)</b> |
|--------------------------------------------|----------------------------|------------------------------------------------|
| NYISO                                      | NYISO                      | 32.26                                          |
| ISO-NE                                     | ISONE                      | 31.93                                          |
| CAISO                                      | CAISO                      | 23.11                                          |
| ERCOT                                      | ERCOT                      | 71.46                                          |
| PJM                                        | PJM                        | 33.5                                           |
| MISO                                       | MISO                       | 34.7                                           |
| BPA                                        | BPAT                       | 45.32                                          |
| WAPA Rocky Mountain Region                 | WACM                       | 22.78                                          |
| Duke Energy Carolinas LLC                  | DUK                        | 33.3                                           |
| PacifiCorp East                            | PACE                       | 32.53                                          |
| Duke Energy Florida Inc                    | FPC                        | 23.6                                           |
| Southern Co Services Inc                   | SOCO                       | 31.29                                          |
| Florida Municipal Power Pool               | FPL                        | 32.88                                          |
| El Paso Electric                           | ERCOT                      | 71.46                                          |
| Arizona Public Service Co                  | AZPS                       | 27.92                                          |
| Southwest Power Pool (Balancing Authority) | SPP                        | 35.42                                          |
| Nevada Power Co                            | NEVP                       | 29.1                                           |

**Table S3. Plant to demand region mapping.**

| plant_name           | state | demand_region   |
|----------------------|-------|-----------------|
| 59th Street          | NY    | NYISO           |
| A L Pierce           | CT    | ISO-NE          |
| Agnews Power Plant   | CA    | CAISO           |
| Alameda              | CA    | CAISO           |
| Arthur Von Rosenberg | TX    | ERCOT           |
| Aurora               | IL    | PJM             |
| Bergen Generating St | NJ    | PJM             |
| Big Cajun 1          | LA    | MISO            |
| Bluegrass Generating | KY    | PJM             |
| Carty Generating Sta | OR    | BPA             |
| Chesterfield         | VA    | PJM             |
| Cleveland Cnty Gener | NC    | Duke Carolinas  |
| Coyote Springs       | OR    | BPA             |
| Coyote Springs II    | OR    | BPA             |
| Decker Creek         | TX    | ERCOT           |
| Donald Von Raesfeld  | CA    | CAISO           |
| Doswell Energy Cente | VA    | PJM             |
| Fort Pierce Generati | UT    | PacifiCorp East |
| Gianera              | CA    | CAISO           |
| Gilroy Peaking Energ | CA    | CAISO           |
| Gilroy Power Plant   | CA    | CAISO           |
| Gravel Neck          | VA    | PJM             |
| Hermiston Generating | OR    | BPA             |
| Hermiston Power Part | OR    | BPA             |
| Hines Energy Complex | FL    | Duke Florida    |
| Hopewell Cogeneratio | VA    | PJM             |
| Inver Hills          | MN    | MISO            |
| Kings Mountain Energ | NC    | Duke Carolinas  |
| Ladysmith            | VA    | PJM             |
| Lamar Power Project  | TX    | ERCOT           |
| Los Esteros Critical | CA    | CAISO           |
| Mariposa Energy Proj | CA    | CAISO           |
| Marsh Run Generation | VA    | PJM             |
| Metcalf Energy Cente | CA    | CAISO           |
| Midlothian Energy Fa | TX    | ERCOT           |
| Millcreek Power Gene | UT    | PacifiCorp East |
| Minnesota River      | MN    | MISO            |
| Morgan Creek         | TX    | ERCOT           |
| Moxie Freedom Genera | PA    | PJM             |
| Mulberry Cogeneratio | FL    | FMPP            |
| Murray Turbine       | UT    | PacifiCorp East |
| Ocotillo             | AZ    | Arizona PSC     |
| Orange Cogeneration  | FL    | FMPP            |
| Panda Temple Power S | TX    | ERCOT           |
| Paris (WI)           | WI    | MISO            |
| Paris Energy Center  | TX    | ERCOT           |
| Potomac Energy Cente | VA    | PJM             |
| Remington            | VA    | PJM             |
| St Joseph Energy Cen | IN    | MISO            |
| T H Wharton          | TX    | ERCOT           |
| TVA Southaven Combin | MS    | MISO            |
| Tenaska Frontier Gen | TX    | ERCOT           |
| Tiger Bay            | FL    | Duke Florida    |
| V H Braunig          | TX    | ERCOT           |
| Victoria             | TX    | ERCOT           |
| Victoria City Power  | TX    | ERCOT           |
| Wallingford Energy   | CT    | ISO-NE          |

## References

- [1] “LCOE Data Viewer”. Bloomberg New Energy Finance (BNEF), 2024.
- [2] University of Wisconsin-Madison. “Active Power Ramp Rates”. Neos Guide, 2013. [https://neos-guide.org/wp-content/uploads/2022/04/ramp\\_rates.pdf](https://neos-guide.org/wp-content/uploads/2022/04/ramp_rates.pdf)
- [3] “Gas turbine portfolio”. Siemens, 2019. <https://assets.new.siemens.com/siemens/assets/api/uuid:ab8578bf-d86f-45d9-a26b-7ac7a274fadd/siemens-gas-turbine-portfolio.pdf>
- [4] J. Ingham and M. Adhikari. “Aeroderivative gas turbines”. GE, 2019. [https://www.gevernova.com/content/dam/gepower-microsites/global/en\\_US/documents/avr/GEA34130%20AeroderivativeGT\\_Whitepaper\\_R5.pdf](https://www.gevernova.com/content/dam/gepower-microsites/global/en_US/documents/avr/GEA34130%20AeroderivativeGT_Whitepaper_R5.pdf)
- [5] A. Bagga et al. “Impact of Detailed Parameter Modeling of Open-Cycle Gas Turbines on Production Cost Simulation”. NREL, 2023. <https://docs.nrel.gov/docs/fy24osti/87554.pdf>
- [6] J. Seel et al. “Utility-Scale Solar, 2024 Edition: Empirical Trends in Deployment, Technology, Cost, Performance, PPA Pricing, and Value in the United States”. Lawrence Berkeley National Laboratory (LBNL), 2024. <https://emp.lbl.gov/publications/utility-scale-solar-2024-edition>
